# Supplementary material for: Genome-wide Identification of Metal Tolerance Protein Genes in Peanut: Differential Expression in the Root of Two Contrasting Cultivars Under Metal Stresses
Source: Front Plant Sci. 2022 Apr 1;13:791200. doi: 10.3389/fpls.2022.791200 (PMC9011049; doi:10.3389/fpls.2022.791200)
Supplement: Supplementary file 1 [file Data_Sheet_1.xlsx]

## Sheet: Supplementary Table 1
Supplementary Table 1. Primers of peanut AhMTP genes selected for qRT-PCR analysis
Genes	Forward (5'→3')	Reverse (5'→3')
AhMTP1.1	GTGCTTATCTCCATGTCCTCG	TCGTCCCCAGAACAATTACC
AhMTP2.1	TCCCAGCACAGCATTTGGAT	GCCACAGTTGGATGGGACTT
AhMTP4.1	GTCGCTCTCCAACCTTAATCTC	TGCTGTCAGATGCCACTATG
AhMTP9.1	GTTGAAAGGAGTGAAAGAGCAG	CCAGACAAGAGATCCAAGAGTG
AhMTP10.1	AGCGCAAAACCCACCACGTA	GCGGTTCAGTTCTGCCTCT
AhMTP11.1	ACGGCGTTTTAGGGGTTTCT	TCGAAGTTCAACCGCCATGA
AhMTP12	CTCCAGAGAGTTCCGAGAGCG	GAAGTGTCCCAACTACATCTGTG
AhMTPB1	ATGACCTGCACGTTTGGGC	CGAACAAGACACATCCTGTGAA
AhMTPC2.1	CCGTGTTGGTTTGGTGTCTG	GGGCTTCAACTGCTAGGGAG
AhMTPC4.1	CATTCTCAACCAACAACCTCCTTC	TTGAGGATCGAAGAGGAGCA
Ah60S	ACAGTTGGTCCTCACTTCAG	GCTCATTTATGTAAGCTTCCCT

## Sheet: Supplementary Table 2
Supplementary Table 2. Analysis of the 15 conserved motifs of AhMTP genes in peanut
motif	Logo	Sequence	Width	Annotation
1		MIYCRKFKNEIVKAYAQDHFFDVITNVVG	29	Not Found
2		NHHKQVKHIDTVRAYTFGSHYFVEVDIV	28	Not Found
3		LWFTAFSMKTPNPYQYPIGKKRMQPLGIJVFASVMATLGLQ	41	Cation_efflux_TMD
4		WIDPVGAIJJALYTIRTWSRTVLENVNSLVGRSAPPEYLQKLTYLC	46	Cation_efflux_TMD
5		DMPLQZAHDIGESLQEKLEKLPEIERAFVHJDYEYTHKPEH	41	Cation_efflux_CTD
6		LFIAKVYAGIRSGSLAIIASTLDSLLDLL	29	Cation_efflux_TMD
7		LGQZDKIAEYYQKQVEVLEGFNEMDALAERGFIPGMSTEEZ	41	Not Found
8		QSDEQRSLLSPDSNNGDRSWRLNFEGFQMSSPHADKQVKPSRGIHDCYGV	50	Not Found
9		TETAPELTPEQEQWIIGIMVSVTLVKFLL	29	Not Found
10		GVMIGGAIIWYKPEWQIVDLICTLIFSVIVLGTTIPMLRNILGILMERTP	50	Cation_efflux_TMD
11		AFAISLFSLWASRWEPDPEQSYGYNRLEV	29	Cation_efflux_TMD
12		SHPHGHSHAHAHEHVHSHGHGDHHHGIDM	29	Not Found
13		IWGJAGFLVYEAIGRLVAGPREVDGTLMFLIAAFGFVFNFIMVVWLGHDH	50	Cation_efflux_TMD
14		EEIBLEKJESDJLSLEGVQEVHELHVWAJTVGKIVLSCHVK	41	Cation_efflux_CTD
15		KFJDPLAGLLVSGMILKAGAETGYQSILE	29	Not Found

## Sheet: Supplementary Table 3
Supplementary Table 3. The cis-regulatory elements in the promoter regions of AhMTP genes
Function	cis-acting elements	AhMTP1.1	AhMTP1.2	AhMTP1.3	AhMTP2.1	AhMTP2.2	AhMTP2.3	AhMTP2.4	AhMTP4.1	AhMTP4.2	AhMTP9.1	AhMTP9.2	AhMTP10.1	AhMTP10.2	AhMTP11.1	AhMTP11.2	AhMTP11.3	AhMTP11.4	AhMTP12	AhMTPB1	AhMTPB2	AhMTPC2.1	AhMTPC2.2	AhMTPC4.1	AhMTPC4.2
Gene transcription	CAAT-box	27	27	13	20	22	14	16	15	16	13	11	22	20	22	19	23	22	6	26	28	24	23	22	26
	TATA-box	19	17	24	41	46	15	24	31	94	73	64	27	25	29	6	33	29	6	29	28	18	20	37	29
	DRE core							1
	A-box														2			2
Light responsiveness	3-AF1 binding site														1	1		1
	ACE									1		1											1
	AE-box			1				1	1										1		1
	AT1-motif											1		1	2			2
	ATC-motif										1
	ATCT-motif												1		1			1						1	1
	Box 4	1	1	1	2	1	2	2	2	2	7	2	1	2			1			2	4			2	1
	Box II										1
	chs-CMA1a										1
	chs-CMA2a						2												1						1
	GA-motif				1							2												2
	GATA-motif	1	1	1			5	1			1			2
	G-box			2	6	7	1		2		4		1	1	4	2	1	4	2	1	1	1	1
	GT1-motif			1				1	2		1		2	2
	I-box			1			2																		1
	L-box				1	1
	MRE														1			1	1
	TCCC-motif						2	1					1										1
	LAMP-element							1
	TCT-motif			1			1		1				1			1	1		1				1
Abiotic stress responsive	ARE	2	2	1	1	1							1	2	3		1	3	1			4	3
	LTR	1	1										1	1										1	2
	MBS	1	1						1										1			1
	TC-rich repeats			1		1																1
Tissue expression	CAT-box							1	1							1
	GCN4_motif												1
Phytohormone responsive	ABRE			2	5	6	2		2		4		1	1	5	2	1	5	2	1	1
	CGTCA-motif			1						1	1		1	2	1			1		1					1
	GARE-motif			1															1
	P-box			1									1	1
	TCA-element					1								1					1
	TGACG-motif			1						1	1		1	2	1			1		1			1
	TGA-element						1					1			2	2	2	2		2	2
	AuxRR-core			1
Biotic stress responsive	AT-rich sequence							1	1
Secondary metabolism	MBSI													1
	O2-site				1	1			1		1
Circadian control	circadian						1				1
Site-binding	AT-rich element										1
	CCAAT-box			1			1								1	2	1	1
cell cycle regulation	MSA-like	1					1												1

## Sheet: Supplementary Table 4
Supplementary Table 4. Expression profiles (FPKM) of AhMTP genes in different tissues of peanut
Gene id	Gene Name	Lateral stem leaf	Mainstem leaf	Seedling leaf	Vegetative shoot tip	Reproductive shoot tip	root	Nodule	Perianth	Stamen	Pistils	Peg tip aerial	Peg tip below soil	Peg tip to fruit Pattee 1	Fruit Pattee 1	Fruit Pattee 3	Pericarp Pattee 5	Pericarp Pattee 6	Seed Pattee 5	Seed Pattee 6	Seed Pattee 7	Seed Pattee 8	Seed Pattee 10
Arahy.ARQ7QI	AhMTP1.1	12.5406	16.5938	11.0672	28.6198	31.4653	13.123	21.9915	5.42727	10.274	11.2053	15.1276	15.51	9.66643	14.1767	15.4977	11.4455	7.6588	33.6285	33.0027	48.5962	95.0094	304.694
Arahy.854BZC	AhMTP1.2	13.9389	13.1933	9.53954	18.9052	24.4089	7.10395	12.9113	5.07666	10.215	8.05021	16.2583	13.0249	3.48145	15.4676	10.2105	7.23562	3.95151	28.0533	23.9143	20.5921	23.4635	23.6179
Arahy.NB6CJE	AhMTP1.3	0.755646	1.17966	1.16297	1.97466	2.15804	2.26335	0	1.78399	1.99607	0.993902	0.729518	1.88355	0.23876	7.67666	3.2507	1.48451	0.764762	2.41424	3.93816	3.68333	1.79397	0.711305
Arahy.5I5ID6	AhMTP2.1	11.2692	10.7946	10.4844	9.22206	12.1025	11.3684	5.46471	20.1477	4.047	10.079	5.33115	2.8948	8.94636	4.30015	7.33545	6.82327	5.02392	9.05393	7.95066	12.7326	10.6602	24.6823
Arahy.L0WASJ	AhMTP2.2	6.00277	5.8468	6.10337	7.36864	7.96468	10.5707	3.85202	11.0661	3.42853	5.12101	2.90985	2.65202	6.77755	3.02173	4.04379	4.76845	4.77173	6.33125	7.65911	7.8101	6.85784	12.4565
Arahy.INQ3MB	AhMTP2.3	1.06319	1.94107	3.03115	0.424461	0.328515	0.0444126	0	0	0	0.975886	0.34179	0	0	0	0.171654	0.28191	0	1.00081	0.499832	0.105718	0	0
Arahy.XK0FMC	AhMTP2.4	0.054939	0.200492	0.205409	0	0.415708	0	0	0	0	0.894016	0.367157	0.510891	0.386628	0	0.201181	0.330692	0.400731	0	0.100785	0	0	0
Arahy.N1ZWYI	AhMTP4.1	16.698	16.5715	15.2192	8.22258	9.83654	18.6491	24.0414	17.786	17.2922	30.7841	27.1701	25.1739	29.5138	30.9036	45.1684	45.4396	41.0371	27.6231	28.1248	20.8783	22.5078	60.3042
Arahy.LH0XEN	AhMTP4.2	7.01792	8.19834	5.49673	17.1361	12.9943	20.3263	37.6266	28.393	12.7197	28.0618	21.3739	26.3733	30.8068	22.1037	29.2057	34.1945	31.3533	28.1808	36.4649	30.6012	31.8995	32.5293
Arahy.1E45SP	AhMTP9.1	0.346548	0.689337	0.257486	1.56351	3.02375	2.59489	0.452272	0	1.10512	0.038635	0.74389	1.48509	0.197236	1.12739	1.34559	0.703709	0.389297	1.4698	1.34209	1.136	0.576325	0.87726
Arahy.3T6XNU	AhMTP9.2	0.478354	1.40556	0.847104	3.66594	5.87645	3.78959	1.13701	0	4.30452	0.810148	2.36099	2.84329	0.71628	3.50933	2.85731	1.39011	1.05843	4.39591	4.38721	1.61589	0.640705	1.46741
Arahy.DW8A2N	AhMTP10.1	62.9181	55.7762	59.1775	5.99928	7.9688	7.96992	1.46577	32.8303	3.20113	36.7521	11.1009	0.605854	0.728479	2.83906	8.15538	3.87209	4.35635	24.5289	21.6334	15.5798	1.65866	2.29402
Arahy.JR9DQ2	AhMTP10.2	58.0573	58.9852	52.2781	8.44887	9.84129	16.552	5.07483	30.6345	3.824	31.7673	11.1294	1.0982	1.52318	3.05199	8.13265	7.64183	6.78837	17.9378	25.101	21.3282	5.47358	2.45369
Arahy.J9LUB0	AhMTP11.1	1.70646	1.89537	1.34309	0.610597	1.31232	0.877157	0.524661	5.33218	2.96934	2.42494	1.27375	0.496649	17.0804	0.441989	4.22047	8.74091	11.4597	1.49276	1.23235	10.9818	0.430372	0.243815
Arahy.C1W7MD	AhMTP11.2	2.63986	2.7187	2.58104	3.24857	3.98515	2.99887	2.19725	1.81189	1.83653	2.00628	2.22262	1.49495	1.88644	3.03266	2.33118	1.62574	0.874986	4.71034	3.55255	2.70538	2.02488	2.38052
Arahy.F3QZDX	AhMTP11.3	4.08319	5.26539	4.981	5.83939	9.1722	7.81768	1.11362	1.23731	4.46555	3.26107	5.28821	4.45451	3.50543	4.56722	3.70156	3.82587	4.32393	3.4312	1.74334	0.938589	0.516447	1.97914
Arahy.HJ8JHV	AhMTP11.4	0	0.076614	0	0	0	0	0	0.129001	0.143657	0.040391	0	0.150015	0	0	0.0953802	0	0.0576857	0	0	0	0.0860745	0
Arahy.LDE0EK	AhMTP12	0	0	0	0	0	0	0	0	0	0	0	0	0	0	0	0	0	0	0	0	0	0
Arahy.IEEP0H	AhMTPB1	0	0	0	0	0	0	0	0	0	0	0	0	0	0	0	0	0	0	0	0	0	0
Arahy.WGY3ZU	AhMTPB2	0	0	0	0	0	0	0	0	0	0	0	0	0	0	0	0	0	0	0	0	0	0
Arahy.C1QR5S	AhMTPC2.1	3.86541	4.45818	3.9194	7.01879	9.52265	6.88171	5.68057	3.72947	11.8966	5.34179	6.34147	7.6307	11.5321	7.36959	6.37945	5.67658	6.0881	8.82695	14.5929	27.9459	29.6903	10.458
Arahy.F8DN54	AhMTPC2.2	2.85314	4.08627	2.44478	9.01195	8.61867	6.52141	4.40779	5.59899	5.9762	3.31031	5.00463	5.85738	8.12978	4.3757	6.87018	6.23	6.08874	5.9408	10.872	23.6858	25.5641	5.91531
Arahy.2A2X48	AhMTPC4.1	8.71619	10.3265	12.4114	9.58134	9.53796	10.3109	4.84969	3.85998	7.55115	10.9859	13.3413	12.9726	13.1783	11.7477	10.168	12.9685	12.9463	5.50442	5.27495	4.36357	3.93294	5.1283
Arahy.660VQ8	AhMTPC4.2	6.16576	7.26518	8.10812	7.03275	10.1414	10.3045	6.64522	6.37896	12.5894	7.8025	14.0542	13.2537	12.4366	13.4942	10.9509	15.1882	14.3126	9.78445	8.09153	6.05492	5.25581	4.80883
